# Supplementary material for: Tristetraprolin, Inflammation, and Metabolic Syndrome in Arab Adults: A Case Control Study
Source: MDPI journal article supplement (doi:10.3390/biology10060550), 2021-06-18
Supplement: s1 [file s1]

**Supplementary Table S1.** Anthropometric and clinical characteristics of the study participants.

| Parameters                | All           | Control       | MetS          | <i>p</i> -Value | <i>p</i> -Value Adjusted for Age |
|---------------------------|---------------|---------------|---------------|-----------------|----------------------------------|
| N                         | 200 (94/106)  | 100 (50/50)   | 100 (44/56)   |                 |                                  |
| BMI (kg/m <sup>2</sup> )  | 29.8 ± 5.5    | 27.7 ± 5.2    | 31.8 ± 5.1    | <0.001          | <0.001                           |
| Waist (cm)                | 96.5 ± 17.6   | 87.6 ± 14.9   | 105.6 ± 15.5  | <0.001          | <0.001                           |
| Hips (cm)                 | 106.7 ± 13.6  | 104.8 ± 12.9  | 108.5 ± 14.2  | 0.053           | 0.10                             |
| Waist-Hip Ratio           | 0.91 ± 0.16   | 0.84 ± 0.11   | 0.98 ± 0.17   | <0.001          | <0.001                           |
| Systolic BP (mmHg)        | 124.3 ± 15.7  | 118.0 ± 11.7  | 130.6 ± 16.6  | <0.001          | <0.001                           |
| Diastolic BP (mmHg)       | 74.9 ± 11.1   | 70.9 ± 9.2    | 78.9 ± 11.4   | <0.001          | <0.001                           |
| Glucose (mmol/L)          | 5.9 ± 1.9     | 5.3 ± 1.1     | 6.7 ± 2.2     | <0.001          | <0.001                           |
| Total Cholesterol (mmo/L) | 5.3 ± 1.3     | 5.2 ± 1.0     | 5.5 ± 1.6     | 0.19            | 0.37                             |
| LDL-C (mmol/L)            | 3.3 ± 1.2     | 3.4 ± 0.9     | 3.3 ± 1.4     | 0.87            | -----                            |
| HDL-C (mmol/L)            | 1.1 ± 0.3     | 1.2 ± 0.3     | 1.03 ± 0.3    | <0.001          | <0.001                           |
| Triglycerides (mmol/L)    | 1.8 (1.1-2.4) | 1.2 (0.9-1.5) | 2.3 (1.9-2.8) | <0.001          | <0.001                           |

**Note:** Data presented in mean ± SD and median (25th–75th) percentiles. Independent T-Test and Mann-Whitney U test was done. *P*-value significant at *p* < 0.05, 0.01 level.

**Supplementary Table S2.** Correlation of TTP with other parameters.

| Parameters               | All (N = 200) |         |       | Males (N = 94) |         |         | Females (N = 106) |         |       |
|--------------------------|---------------|---------|-------|----------------|---------|---------|-------------------|---------|-------|
|                          | All           | Control | MetS  | All            | Control | MetS    | All               | Control | MetS  |
| Age (years)              | 0.18*         | 0.04    | −0.02 | 0.25*          | 0.38    | 0.06    | 0.09              | 0.02    | −0.08 |
| Height (cm)              | −0.1          | −0.02   | −0.14 | 0.14           | 0.21    | −0.23   | −0.1              | 0.13    | −0.14 |
| Weight (kg)              | 0.18*         | 0.17    | −0.13 | 0.33**         | 0.41**  | −0.47** | 0.075             | −0.11   | 0.07  |
| BMI (kg/m <sup>2</sup> ) | 0.27**        | 0.24*   | −0.02 | 0.35**         | 0.42**  | −0.31*  | 0.09              | −0.21   | 0.15  |
| Waists (cm)              | 0.21**        | 0.01    | −0.03 | 0.33**         | 0.23    | −0.17   | 0.19              | −0.07   | 0.09  |
| Hip (cm)                 | 0.13          | 0.19    | −0.04 | 0.29**         | 0.36*   | −0.17   | −0.9              | −0.28   | 0.04  |
| WHR                      | 0.15*         | −0.2    | 0.10  | 0.25*          | −0.04** | −0.04   | 0.20*             | 0.13    | 0.03  |
| SBP (mm Hg)              | 0.09          | −0.10   | −0.06 | 0.18           | 0.11    | −0.27   | 0.05              | −0.26   | 0.02  |
| DBP (mm Hg)              | 0.19**        | 0.07    | 0.02  | 0.13           | 0.38    | −0.19   | 0.19              | 0.02    | 0.15  |
| Glucose (mmol/L)         | 0.25**        | 0.19    | 0.09  | 0.40**         | 0.1     | 0.23    | 0.18              | 0.26    | 0.003 |
| T. Cholesterol (mmo/L)   | 0.06          | 0.13    | −0.07 | 0.03           | 0.23    | −0.25   | 0.09              | 0.08    | 0.10  |
| LDL-C (mmol/L)           | 0.04          | 0.13    | −0.04 | −0.012         | 0.18    | −0.22   | 0.10              | 0.141   | 0.10  |
| HDL-C (mmol/L)           | −0.15*        | −0.03   | −0.1  | −0.50**        | −0.12   | −0.48** | −0.07             | −0.002  | 0.01  |
| Triglycerides (mmol/L)   | 0.21**        | 0.07    | −0.07 | 0.40**         | 0.21    | −0.01   | 0.10              | −0.17   | −0.11 |
| Leptin (pg/ml)           | 0.10          | 0.04    | 0.16  | 0.11           | 0.16    | 0.20    | 0.10              | 0.03    | 0.13  |
| TNF-α (pg/ml)            | 0.18*         | 0.003   | 0.11  | 0.30*          | −0.15   | −0.01   | 0.09              | −0.16   | 0.20  |
| IL-1β (pg/ml)            | 0.31**        | 0.25*   | 0.02  | 0.41**         | 0.16    | 0.15    | 0.17              | 0.16    | −0.06 |
| CRP (ng/ml)              | 0.18*         | 0.15    | −0.16 | 0.36**         | 0.34*   | −0.21   | 0.03              | −0.01   | −0.14 |
| Adiponectin (ng/mL)      | 0.1           | 0.07    | 0.13  | 0.2            | 0.23    | 0.36*   | 0.002             | 0.00    | 0.05  |
| Insulin (μIU/mL)         | 0.18*         | −0.01   | 0.17  | 0.25*          | 0.05    | 0.37*   | 0.17              | 0.09    | −0.15 |
| HOMA-IR                  | 0.24**        | 0.04    | 0.18  | 0.31*          | 0.05    | 0.40*   | 0.23              | 0.19    | −0.13 |
| HOMA-B                   | 0.08          | −0.5    | −0.4  | 0.15           | 0.14    | 0.09    | 0.08              | −0.02   | −0.16 |

**Note:** Data presented as coefficient (R); \* denotes significance at 0.05 level; \*\* denotes significance at 0.01 level.
